# Supplementary material for: Microbiome Management by Biological and Chemical Treatments in Maize Is Linked to Plant Health
Source: PubMed Central journal article supplement (PMC7599774; doi:10.3390/microorganisms8101506), 2020-09-30
Supplement: microorganisms-08-01506-s001.pdf [file microorganisms-08-01506-s001.pdf]

Table S1: Statistical evaluation of agronomic parameters and qPCR measurements tested using pairwise t-Test.

| Test set   | Category       |           | CB       | CF       | P69B  |
|------------|----------------|-----------|----------|----------|-------|
| complete   | Emergence rate | CF        | 0.493    | -        | -     |
|            |                | P69B      | 0.15     | 0.435    | -     |
|            |                | P69F      | 0.355    | 0.116    | 0.024 |
|            | Fresh weight   | CF        | 0.168    | -        | -     |
|            |                | P69B      | 0.811    | 0.269    | -     |
|            |                | P69F      | 0.021    | 0.339    | 0.043 |
|            | Yield          | CF        | 0.74     | -        | -     |
|            |                | P69B      | 0.87     | 0.87     | -     |
|            |                | P69F      | 0.94     | 0.69     | 0.82  |
| Melk       | Emergence rate | CF        | 0.434    | -        | -     |
|            |                | P69B      | 0.084    | 0.282    | -     |
|            |                | P69F      | 0.915    | 0.496    | 0.099 |
|            | Fresh weight   | CF        | 0.98     | -        | -     |
|            |                | P69B      | 0.85     | 0.88     | -     |
|            |                | P69F      | 0.24     | 0.28     | 0.22  |
|            | Yield          | CF        | 0.55     | -        | -     |
|            |                | P69B      | 0.53     | 0.98     | -     |
|            |                | P69F      | 0.34     | 0.7      | 0.72  |
| Mitterdorf | Emergence rate | CF        | 0.889    | -        | -     |
|            |                | P69B      | 0.414    | 0.493    | -     |
|            |                | P69F      | 0.017    | 0.021    | 0.063 |
|            | Fresh weight   | CF        | 0.031    | -        | -     |
|            |                | P69B      | 0.353    | 0.141    | -     |
|            |                | P69F      | 0.017    | 0.713    | 0.078 |
|            | Yield          | CF        | 0.58     | -        | -     |
|            |                | P69B      | 0.70     | 0.87     | -     |
|            |                | P69F      | 0.78     | 0.78     | 0.91  |
| qPCR       |                | Bulk_soil | CB       | CF       | P69B  |
|            | CB             | 1         | -        | -        | -     |
|            | CF             | 1         | 1        | -        | -     |
|            | P69B           | 0.00013   | 5.90E-05 | 2.00E-05 | -     |
|            | P69F           | 6.30E-05  | 2.90E-05 | 1.00E-05 | 1     |

Table S2: Sequencing overview of 16S amplicons for each sample and observed alpha diversity.

| Sample ID                 | Sample type | Field location | Treatment | Filtered quality sequences | Shannon diversity index |
|---------------------------|-------------|----------------|-----------|----------------------------|-------------------------|
| soil_Mitterdorf1_bacteria | soil        | Mitterdorf     | none      | 36260                      | 6.3                     |
| soil_Mitterdorf2_bacteria | soil        | Mitterdorf     | none      | 33070                      | 6.3                     |
| soil_Mitterdorf3_bacteria | soil        | Mitterdorf     | none      | 16690                      | 5.9                     |
| soil_Mitterdorf4_bacteria | soil        | Mitterdorf     | none      | 9193                       | 5.6                     |
| soil_Melk1_bacteria       | soil        | Melk           | none      | 21547                      | 6.2                     |

|                                       |             |            |      |        |     |
|---------------------------------------|-------------|------------|------|--------|-----|
| soil_Melk2_bacteria                   | soil        | Melk       | none | 12472  | 6.0 |
| soil_Melk3_bacteria                   | soil        | Melk       | none | 68602  | 6.8 |
| soil_Melk4_bacteria                   | soil        | Melk       | none | 37257  | 6.5 |
| rhizosphere_Mitterdorf_CB1_bacteria   | rhizosphere | Mitterdorf | CB   | 30527  | 6.2 |
| rhizosphere_Mitterdorf_CB2_bacteria   | rhizosphere | Mitterdorf | CB   | 53169  | 6.3 |
| rhizosphere_Mitterdorf_CB3_bacteria   | rhizosphere | Mitterdorf | CB   | 14234  | 5.9 |
| rhizosphere_Melk_CB1_bacteria         | rhizosphere | Melk       | CB   | 30068  | 6.2 |
| rhizosphere_Melk_CB2_bacteria         | rhizosphere | Melk       | CB   | 14246  | 5.1 |
| rhizosphere_Melk_CB3_bacteria         | rhizosphere | Melk       | CB   | 40783  | 6.0 |
| rhizosphere_Mitterdorf_CF1_bacteria   | rhizosphere | Mitterdorf | CF   | 7766   | 5.5 |
| rhizosphere_Mitterdorf_CF2_bacteria   | rhizosphere | Mitterdorf | CF   | 2790   | 4.9 |
| rhizosphere_Mitterdorf_CF3_bacteria   | rhizosphere | Mitterdorf | CF   | 5393   | 5.2 |
| rhizosphere_Melk_CF1_bacteria         | rhizosphere | Melk       | CF   | 40360  | 5.8 |
| rhizosphere_Melk_CF2_bacteria         | rhizosphere | Melk       | CF   | 27217  | 5.2 |
| rhizosphere_Melk_CF3_bacteria         | rhizosphere | Melk       | CF   | 11194  | 5.1 |
| rhizosphere_Mitterdorf_P69B1_bacteria | rhizosphere | Mitterdorf | P69B | 11280  | 5.6 |
| rhizosphere_Mitterdorf_P69B2_bacteria | rhizosphere | Mitterdorf | P69B | 32102  | 6.0 |
| rhizosphere_Mitterdorf_P69B3_bacteria | rhizosphere | Mitterdorf | P69B | 19881  | 5.7 |
| rhizosphere_Melk_P69B1_bacteria       | rhizosphere | Melk       | P69B | 106544 | 3.8 |
| rhizosphere_Melk_P69B2_bacteria       | rhizosphere | Melk       | P69B | 13501  | 5.7 |
| rhizosphere_Melk_P69B3_bacteria       | rhizosphere | Melk       | P69B | 48768  | 6.0 |
| rhizosphere_Mitterdorf_P69F1_bacteria | rhizosphere | Mitterdorf | P69F | 6503   | 5.5 |
| rhizosphere_Mitterdorf_P69F2_bacteria | rhizosphere | Mitterdorf | P69F | 31655  | 6.3 |
| rhizosphere_Mitterdorf_P69F3_bacteria | rhizosphere | Mitterdorf | P69F | 51874  | 6.6 |
| rhizosphere_Melk_P69F1_bacteria       | rhizosphere | Melk       | P69F | 48190  | 5.5 |
| rhizosphere_Melk_P69F2_bacteria       | rhizosphere | Melk       | P69F | 20570  | 5.5 |
| rhizosphere_Melk_P69F3_bacteria       | rhizosphere | Melk       | P69F | 23315  | 6.0 |

Table S3: Sequencing overview of ITS amplicons for each sample and observed alpha diversity.

| Sample ID                        | Sample type | Field location | Treatment | Filtered quality sequences | Shannon diversity index |
|----------------------------------|-------------|----------------|-----------|----------------------------|-------------------------|
| soil_Mitterdorf1_fungi           | soil        | Mitterdorf     | none      | 5541                       | 1.9                     |
| soil_Mitterdorf2_fungi           | soil        | Mitterdorf     | none      | 1293                       | 1.8                     |
| soil_Mitterdorf3_fungi           | soil        | Mitterdorf     | none      | 4181                       | 2.2                     |
| soil_Mitterdorf4_fungi           | soil        | Mitterdorf     | none      | 1944                       | 1.6                     |
| soil_Melk1_fungi                 | soil        | Melk           | none      | 1540                       | 2.4                     |
| soil_Melk2_fungi                 | soil        | Melk           | none      | 2825                       | 2.8                     |
| soil_Melk3_fungi                 | soil        | Melk           | none      | 15208                      | 2.9                     |
| soil_Melk4_fungi                 | soil        | Melk           | none      | 5733                       | 2.9                     |
| rhizosphere_Mitterdorf_CB1_fungi | rhizosphere | Mitterdorf     | CB        | 3109                       | 2.7                     |
| rhizosphere_Mitterdorf_CB2_fungi | rhizosphere | Mitterdorf     | CB        | 1072                       | 3.0                     |

|                                    |             |            |      |       |     |
|------------------------------------|-------------|------------|------|-------|-----|
| rhizosphere_Mitterdorf_CB3_fungi   | rhizosphere | Mitterdorf | CB   | 9758  | 2.4 |
| rhizosphere_Melk_CB1_fungi         | rhizosphere | Melk       | CB   | 4016  | 3.1 |
| rhizosphere_Melk_CB2_fungi         | rhizosphere | Melk       | CB   | 1936  | 3.0 |
| rhizosphere_Melk_CB3_fungi         | rhizosphere | Melk       | CB   | 7557  | 2.7 |
| rhizosphere_Mitterdorf_CF1_fungi   | rhizosphere | Mitterdorf | CF   | 6712  | 3.2 |
| rhizosphere_Mitterdorf_CF2_fungi   | rhizosphere | Mitterdorf | CF   | 3837  | 2.3 |
| rhizosphere_Mitterdorf_CF3_fungi   | rhizosphere | Mitterdorf | CF   | 5318  | 2.4 |
| rhizosphere_Melk_CF1_fungi         | rhizosphere | Melk       | CF   | 5581  | 2.9 |
| rhizosphere_Melk_CF2_fungi         | rhizosphere | Melk       | CF   | 2948  | 1.7 |
| rhizosphere_Melk_CF3_fungi         | rhizosphere | Melk       | CF   | 4714  | 2.5 |
| rhizosphere_Mitterdorf_P69B1_fungi | rhizosphere | Mitterdorf | P69B | 13190 | 2.2 |
| rhizosphere_Mitterdorf_P69B2_fungi | rhizosphere | Mitterdorf | P69B | 5307  | 3.0 |
| rhizosphere_Mitterdorf_P69B3_fungi | rhizosphere | Mitterdorf | P69B | 5263  | 1.4 |
| rhizosphere_Melk_P69B1_fungi       | rhizosphere | Melk       | P69B | 4183  | 2.4 |
| rhizosphere_Melk_P69B2_fungi       | rhizosphere | Melk       | P69B | 6224  | 2.5 |
| rhizosphere_Melk_P69B3_fungi       | rhizosphere | Melk       | P69B | 10616 | 2.4 |
| rhizosphere_Mitterdorf_P69F1_fungi | rhizosphere | Mitterdorf | P69F | 7158  | 2.9 |
| rhizosphere_Mitterdorf_P69F2_fungi | rhizosphere | Mitterdorf | P69F | 5744  | 2.7 |
| rhizosphere_Mitterdorf_P69F3_fungi | rhizosphere | Mitterdorf | P69F | 7342  | 1.7 |
| rhizosphere_Melk_P69F1_fungi       | rhizosphere | Melk       | P69F | 1626  | 2.9 |
| rhizosphere_Melk_P69F2_fungi       | rhizosphere | Melk       | P69F | 4077  | 2.5 |
| rhizosphere_Melk_P69F3_fungi       | rhizosphere | Melk       | P69F | 780   | 3.0 |

Table S4: Statistical evaluation of explained impact of different factors on bacterial and fungal diversity.

| Factor                         | Bacterial richness analysis |         | Fungal richness analysis |         |
|--------------------------------|-----------------------------|---------|--------------------------|---------|
|                                | F value                     | P value | F value                  | P value |
| Soil only dataset              |                             |         |                          |         |
| Location                       | 2.019                       | 0.205   | 23.63                    | 0.003   |
| Rhizosphere Mitterdorf dataset |                             |         |                          |         |
| Treatment                      | 3.97                        | 0.052   | 0.483                    | 0.703   |
| Rhizosphere Melk dataset       |                             |         |                          |         |
| Treatment                      | 0.384                       | 0.767   | 1.812                    | 0.223   |

Table S5: DESeq2 analysis of bacterial ASVs on the site Mitterdorf. Significantly different ASVs with log-change above 2 are shown.

| Comparison | log2FoldChange | p <sub>adj</sub> | Class                      | Genus                        |
|------------|----------------|------------------|----------------------------|------------------------------|
| CB:CF      | 5.3            | 0.033            | <i>Holophagae</i>          | <i>uncultured Subgroup 7</i> |
|            | 6.2            | 0.045            | <i>Gammaproteobacteria</i> | <i>Stenotrophomonas</i>      |
|            | 6.2            | 0.006            | <i>Subgroup_6</i>          | <i>uncultured Subgroup 6</i> |
|            | 6.2            | 0.001            | <i>Bacteroidia</i>         | <i>uncultured env.OPS17</i>  |
|            | 6.2            | 0.048            | <i>Subgroup_6</i>          | <i>uncultured Subgroup 6</i> |
|            | 6.2            | 0.048            | <i>Gammaproteobacteria</i> | <i>Massilia</i>              |

|         |       |        |                            |                                     |
|---------|-------|--------|----------------------------|-------------------------------------|
|         | 6.2   | 0.007  | <i>Gammaproteobacteria</i> | <i>Ellin6067</i>                    |
|         | 6.3   | 0.008  | <i>Subgroup_6</i>          | <i>uncultured Subgroup 6</i>        |
|         | 6.4   | 0.045  | <i>Gammaproteobacteria</i> | <i>Ellin6067</i>                    |
|         | 6.4   | 0.002  | <i>Verrucomicrobiae</i>    | <i>Candidatus Xiphinematobacter</i> |
|         | 6.6   | 0.001  | <i>KD4-96</i>              | <i>uncultured KD4-96</i>            |
|         | 6.6   | 0.030  | <i>Bacilli</i>             | <i>Bacillus</i>                     |
|         | 6.8   | 0.031  | <i>Alphaproteobacteria</i> | <i>Nordella</i>                     |
|         | 7.4   | <0.001 | <i>Verrucomicrobiae</i>    | <i>Candidatus Xiphinematobacter</i> |
|         | 7.4   | 0.010  | <i>Subgroup_6</i>          | <i>uncultured Subgroup 6</i>        |
|         | 7.4   | 0.048  | <i>Bacteroidia</i>         | <i>Flavobacterium</i>               |
|         | 7.9   | 0.030  | <i>Gammaproteobacteria</i> | <i>Rhizobacter</i>                  |
|         | <hr/> |        |                            |                                     |
| CB:P69B | -9.7  | 0.045  | <i>Verrucomicrobiae</i>    | <i>Opitutaceae</i>                  |
|         | 7.7   | 0.030  | <i>Anaerolineae</i>        | <i>uncultured Anaerolineaceae</i>   |
|         | 7.7   | <0.001 | <i>KD4-96</i>              | <i>uncultured KD4-96</i>            |
|         | <hr/> |        |                            |                                     |
| CB:P69F | 7.7   | <0.001 | <i>Verrucomicrobiae</i>    | <i>Candidatus Xiphinematobacter</i> |

Table S6: DESeq2 analysis of bacterial ASVs on the site Melk. Significantly different ASVs with log-change above 2 are shown.

| Comparison | log2FoldChange | p <sub>adj</sub> | Class                      | Genus                        |
|------------|----------------|------------------|----------------------------|------------------------------|
| CB:CF      | -23.0          | <0.001           | <i>Gammaproteobacteria</i> | <i>Janthinobacterium</i>     |
|            | -22.2          | <0.001           | <i>Bacteroidia</i>         | <i>Pedobacter</i>            |
|            | -10.3          | 0.005            | <i>Gammaproteobacteria</i> | <i>Luteibacter</i>           |
|            | 7.0            | 0.001            | <i>Holophagae</i>          | <i>uncultured Subgroup 7</i> |
|            | 8.0            | <0.001           | <i>Subgroup 6</i>          | <i>uncultured Subgroup 6</i> |
|            | 11.0           | 0.002            | <i>Gammaproteobacteria</i> | <i>Achromobacter</i>         |
|            | <hr/>          |                  |                            |                              |
| CB:P69B    | -20.6          | <0.001           | <i>Bacteroidia</i>         | <i>Pedobacter</i>            |
|            | -20.4          | <0.001           | <i>Gammaproteobacteria</i> | <i>Janthinobacterium</i>     |
|            | -11.6          | 0.002            | <i>Gammaproteobacteria</i> | <i>Luteibacter</i>           |
|            | 9.7            | 0.020            | <i>Gammaproteobacteria</i> | <i>Massilia</i>              |
|            | <hr/>          |                  |                            |                              |
| CB:P69F    | -21.0          | <0.001           | <i>Gammaproteobacteria</i> | <i>Janthinobacterium</i>     |
|            | -19.3          | <0.001           | <i>Bacteroidia</i>         | <i>Pedobacter</i>            |
|            | 11.5           | 0.001            | <i>Gammaproteobacteria</i> | <i>Achromobacter</i>         |

Table S7: DESeq2 analysis of fungal ASVs on the site Mitterdorf. Significantly different ASVs with log-change above 2 are shown.

| Comparison | log2FoldChange | p <sub>adj</sub> | Class                                         | Genus                           |
|------------|----------------|------------------|-----------------------------------------------|---------------------------------|
| CB:CF      | 22.0           | <0.001           | <i>Sordariomycetes</i>                        | <i>Unidentified Nectriaceae</i> |
|            | -20.2          | <0.001           | <i>Mortierellomycotina cls Incertae sedis</i> | <i>Mortierella</i>              |

|         |       |        |                                               |                    |
|---------|-------|--------|-----------------------------------------------|--------------------|
| CB:P69F | -21.2 | <0.001 | <i>Mortierellomycotina cls Incertae sedis</i> | <i>Mortierella</i> |
|---------|-------|--------|-----------------------------------------------|--------------------|

Table S8: DESeq2 analysis of fungal ASVs on the site Melk. Significantly different ASVs with log-change above 2 are shown.

| Comparison | log2FoldChange | padj   | Class                                         | Genus                           |
|------------|----------------|--------|-----------------------------------------------|---------------------------------|
| CB:CF      | -20.5          | <0.001 | <i>Mortierellomycotina cls Incertae sedis</i> | <i>Mortierella</i>              |
|            | -21.3          | <0.001 | <i>Sordariomycetes</i>                        | <i>unidentified Nectriaceae</i> |
| CB:P69B    | -22.6          | <0.001 | <i>Mortierellomycotina cls Incertae sedis</i> | <i>Mortierella</i>              |
|            | 21.9           | <0.001 | <i>Spizellomycetes</i>                        | <i>Spizellomyces</i>            |
|            | -22.0          | <0.001 | <i>Sordariomycetes</i>                        | <i>unidentified Nectriaceae</i> |
| CB:P69F    | -24.2          | <0.001 | <i>Sordariomycetes</i>                        | <i>unidentified Nectriaceae</i> |
|            | -20.7          | <0.001 | <i>Mortierellomycotina cls Incertae sedis</i> | <i>Mortierella</i>              |
